# Supplementary material for: Diagnostic Accuracy of Methods for Detection of Antibodies against Type I Interferons in Patients with Endocrine Disorders
Source: Preprints.org preprint supplement (doi:10.20944/preprints202211.0168.v1), 2022-11-09
Supplement: Supplementary file 1 [file Table S1. Patient characteristics and results of testing serum samples.xlsx]

## Sheet: Patients
Table S1. Patient characteristics and results of testing serum samples for the presence of autoantibodies using microarray-based, cell-based, enzyme-linked immunosorbent,and chemiluminescent microparticle immunoassays
	Abbreviations: CBAA - cell-based autoantibody assay; ELISA enzyme-linked immunosorbent assay; CMIA - chemiluminescent microparticle immunoassay
#	Diagnosis	Age	Gender	APS-1	APS-2	Addison’s disease	Type 1 Diabetes	Autoimmune thyroid diseases	Anti-IFN-ω (Microarray)	Anti-IFN-ω (CBAA)	Anti-IFN-α (Microarray)	Anti-IFN-α (ELISA)	Anti- IL-22 (Microarray)	Anti-21-OH (Microarray)	Anti-21-OH (ELISA)	Anti-GAD (Microarray)	Anti-GAD (ELISA)	Anti-IA2 (Microarray)	Anti-IA2 (ELISA)	Anti-ICA (Microarray)	Anti-ICA (ELISA)	Anti-TG (Microarray)	Anti-TG (CMIA)	Anti-TPO (Microarray)	Anti-TPO (CMIA)
1	APS-2. Type 1 diabetes. Hashimoto's thyroiditis, hypothyroidism. Vitiligo	35	m		+		+	+				n/a						+	+	+		+	+	+	+
2	Type 1 diabetes	19	m				+					n/a						+	+
3	APS-1. Primary adrenal insufficiency. Hypoparathyroidism. Cutaneous candidiasis. Alopecia areata	49	m	+		+			+	+	+	n/a	+	+	+
4	Graves disease	41	f					+				n/a										+	+	+	+
5	Graves disease	22	f					+				n/a										+	+	+	+
6	Type 2 diabetes. Non-autoimmune hypergonadotropic hypogonadism	44	f									n/a
7	Non-autoimmune hypergonadotropic hypogonadism	51	f									n/a
8	Hashimoto's thyroiditis, hypothyroidism. Vitiligo. Alopecia areata	30	f					+				n/a										+	+	+	+
9	APS-2. Type 1 diabetes. Primary hypothyroidism as a result of radioiodine therapy for diffuse toxic goiter	35	f		+		+	+				n/a
10	Graves disease. Graves' ophthalmopathy	71	f					+				n/a
11	Type 1 diabetes	64	m				+					n/a				+									+
12	APS-2. Type 1 diabetes. Hashimoto's thyroiditis, hypothyroidism	24	f		+		+	+				n/a										+	+	+	+
13	APS-2. Type 1 diabetes. Hashimoto's thyroiditis, hypothyroidism	45	f		+		+	+				n/a		+				+	+					+	+
14	Type 1 diabetes	38	m				+					n/a
15	Graves disease	40	f					+				n/a										+	+	+	+
16	Type 2 diabetes;Non-autoimmune hypergonadotropic hypogonadism	88	f									n/a
17	APS-2. Primary adrenal insufficiency.Hypergonadotropic hypogonadism. Hashimoto's thyroiditis, euthyroidism	28	f		+	+		+				n/a		+	+							+	+
18	Graves disease. Graves' ophthalmopathy	60	f					+				n/a										+
19	Type 1 diabetes	28	f				+					n/a
20	Type 1 diabetes	21	f				+					n/a						+	+
21	Graves disease. Graves' ophthalmopathy	68	m					+				n/a										+	+	+	+
22	Graves disease. Graves' ophthalmopathy	56	m					+				n/a										+	+	+	+
23	Graves disease. Graves' ophthalmopathy	47	m					+				n/a												+	+
24	APS-2. Primary adrenal insufficiency. Hashimoto's thyroiditis, hypothyroidism	46	f		+	+		+				n/a		+	+							+		+	+
25	Type 1 diabetes	42	m				+					n/a						+	+
26	Graves disease	35	f					+				n/a
27	Type 1 diabetes	25	f				+					n/a
28	APS-2. Primary adrenal insufficiency.Hypergonadotropic hypogonadism. Hashimoto's thyroiditis, hypothyroidism	36	f		+	+		+				n/a		+	+							+	+	+	+
29	APS-2. Type 1 diabetes. Hashimoto's thyroiditis, hypothyroidism. Malabsorption syndrome	32	f		+		+	+				n/a				+	+					+	+	+	+
30	APS-2. Type 1 diabetes. Hashimoto's thyroiditis, hypothyroidism. Vitiligo. Rheumatoid arthritis	70	m		+		+	+				n/a				+	+
31	Type 2 diabetes.Non-autoimmune hypergonadotropic hypogonadism	63	f									n/a
32	APS-2. Primary adrenal insufficiency. Primary hypothyroidism as a result of thyroidectomy for diffuse toxic goiter	23	f		+	+		+				n/a			+	+	+							+	+
33	APS-2.Graves disease. Primary adrenal insufficiency	31	f		+	+		+				n/a		+	+									+	+
34	APS-2. Primary adrenal insufficiency. Hashimoto's thyroiditis, hypothyroidism. Type 1 diabetes	66	f		+	+	+	+				n/a		+	+									+	+
35	APS-2. Hashimoto's thyroiditis, hypothyroidism. Latent autoimmune diabetes in adults	55	f		+		+	+				n/a						+	+			+	+	+	+
36	Non-autoimmune hypergonadotropic hypogonadism	43	f									n/a
37	Non-autoimmune hypergonadotropic hypogonadism	31	f									n/a							+
38	Type 2 diabetes.Non-autoimmune hypergonadotropic hypogonadism	62	f									n/a
39	Type 1 diabetes	36	f				+					n/a
40	Primary hyperparathyroidism	28	m									n/a
41	Type 2 diabetes.Non-autoimmune hypergonadotropic hypogonadism	70	f									n/a
42	Secondary adrenal insufficiency . Secondary hypothyroidism	40	f									n/a
43	Graves disease. Vitiligo	39	f					+				n/a												+	+
44	APS-2. Primary adrenal insufficiency. Hashimoto's thyroiditis, hypothyroidism	46	f		+	+		+				n/a		+	+								+
45	Healthy control	28	m									n/a
46	Healthy control	18	f									n/a
47	Healthy control	25	f									n/a
48	Healthy control	43	f									n/a
49	APS-1. Primary adrenal insufficiency. Hypoparathyroidism. Chronic mucocutaneous candidiasis. Hypergonadotropic hypogonadism. Hashimoto's thyroiditis, hypothyroidism. Malabsorption syndrome. Enamel hypoplasia. Alopecia totalis. Vitiligo	20	f	+		+			+	+	+	+	+	+	+	+						+	+	+	+
50	APS-2. Primary adrenal insufficiency. Hashimoto's thyroiditis, hypothyroidism	23	f		+							n/a		+	+			+	+			+	+	+	+
51	APS-1. Chronic mucocutaneous candidiasis. Primary adrenal insufficiency. Hypoparathyroidism.Hypergonadotropic hypogonadism	18	f	+		+			+	+	+	+	+		+
52	APS-2. Primary adrenal insufficiency. Hashimoto's thyroiditis, hypothyroidism	33	f		+	+		+				n/a		+	+
53	APS-2. Primary adrenal insufficiency. Type 1 diabetes. Hashimoto's thyroiditis, hypothyroidism	47	f		+	+	+	+				n/a			+					+		+	+	+	+
54	APS-2. Primary adrenal insufficiency. Hashimoto's thyroiditis, hypothyroidism	63	f		+	+		+				n/a		+	+					+	+	+	+	+	+
55	APS-2. Primary adrenal insufficiency. Hashimoto's thyroiditis, hypothyroidism. Hypergonadotropic hypogonadism.	39	f		+	+		+				n/a		+	+					+				+	+
56	Non-autoimmune primary adrenal insufficiency	70	m						+		+	+
57	Primary adrenal insufficiency. Alopecia areata	24	m			+						n/a		+	+
58	APS-2. Primary adrenal insufficiency. Hashimoto's thyroiditis, hypothyroidism	21	f		+	+		+				n/a		+	+			+	+					+	+
59	Autoimmune primary adrenal insufficiency	49	f			+						n/a		+	+									+	+
60	APS-2. Primary adrenal insufficiency. Graves disease. Graves' ophthalmopathy	26	m		+	+		+				n/a		+	+									+	+
61	Autoimmune primary adrenal insufficiency	60	f			+						n/a		+	+							+	+	+	+
62	APS-2. Hashimoto's thyroiditis, hypothyroidism. Latent autoimmune diabetes in adults	54	f		+		+	+				n/a						+	+					+	+
63	APS-2. Primary adrenal insufficiency. Graves disease	61	f		+	+		+				n/a		+	+			+	+			+		+
64	APS-1. Primary adrenal insufficiency. Hypoparathyroidism. Chronic mucocutaneous candidiasis. Hypergonadotropic hypogonadism	29	f	+		+			+	+	+	+	+			+	+			+	+
65	Healthy control	28	f									n/a
66	Hashimoto's thyroiditis, hypothyroidism	67	f					+				n/a												+	+
67	APS-2. Primary adrenal insufficiency. Hashimoto's thyroiditis, hypothyroidism	36	f		+	+		+				n/a		+	+							+	+	+	+
68	Healthy control	25	f									n/a												+
69	Graves disease. Vitiligo	26	f					+				n/a
70	Type 1 diabetes	22	f				+					n/a						+	+
71	Type 1 diabetes	24	m				+					n/a												+
72	Healthy control	31	f									n/a
73	Type 1 diabetes	28	f				+					n/a						+	+	+	+
74	Type 1 diabetes	37	f				+					n/a										+	+	+	+
75	Type 1 diabetes	24	f				+					n/a													+
76	Graves disease	41	f					+				n/a
77	Type 2 diabetes	56	m									n/a
78	APS-2. Primary adrenal insufficiency. Primary hypothyroidism as a result of radioiodine therapy for diffuse toxic goiter	63	f		+	+		+				n/a		+	+							+	+	+	+
79	Type 2 diabetes	61	m									n/a
80	Type 2 diabetes. Multinodular euthyroid goiter	68	f									n/a
81	Type 2 diabetes	50	f									n/a												+
82	Hypopituitarism. Secondary adrenal insufficiency . Secondary hypothyroidism . Hypogonadotropic hypogonadism. Growth hormone deficiency	35	f									n/a					+
83	Primary hyperparathyroidism. Non-autoimmune primary adrenal insufficiency	54	f									n/a
84	Primary hyperparathyroidism.Non-autoimmune hypergonadotropic hypogonadism. Multinodular euthyroid goiter	67	f									n/a
85	Medullary thyroid cancer. Non-autoimmune hypergonadotropic hypogonadism	54	f									n/a													+
86	Nodular euthyroid goiter. Non-autoimmune hypergonadotropic hypogonadism	61	f							n/a		n/a
87	Primary hyperparathyroidism. Multinodular euthyroid goiter	56	f									n/a	+	+
88	Non-autoimmune hypergonadotropic hypogonadism	32	m									n/a					+
89	Hashimoto's thyroiditis, hypothyroidism. Hirata's disease	72	f					+				n/a				+	+			+	+	+	+	+	+
90	Autoimmune hypogonadotropic hypogonadism	20	f									n/a				+	+		+
91	Hashimoto's thyroiditis, hypothyroidism. Alopecia. Psoriasis	28	m					+				n/a			+									+	+
92	Hashimoto's thyroiditis, hypothyroidism	30	f					+				n/a										+	+	+	+
93	Primary hyperparathyroidism.Non-autoimmune hypergonadotropic hypogonadism	68	f									n/a
94	Hypopituitarism. Secondary adrenal insufficiency . Secondary hypothyroidism. Hypogonadotropic hypogonadism	24	f									n/a
95	Hypopituitarism. Secondary adrenal insufficiency . Secondary hypothyroidism. Hypogonadotropic hypogonadism	19	m							n/a		n/a
96	Secondary adrenal insufficiency .Non-autoimmune hypergonadotropic hypogonadism	67	f									n/a
97	Primary hyperparathyroidism.Non-autoimmune hypergonadotropic hypogonadism	56	f									n/a
98	Secondary adrenal insufficiency	37	f									n/a
99	Tertiary hyperparathyroidism . Non-autoimmune hypergonadotropic hypogonadism	63	f									n/a
100	Type 1 diabetes	20	f				+					n/a													+
101	Healthy control	28	f									n/a
102	Healthy control	19	f									n/a
103	APS-1. Primary adrenal insufficiency. Hypergonadotropic hypogonadism. Hypoparathyroidism.Chronic mucocutaneous candidiasis	18	f	+		+			+	+	+	+			+					+		+	+	+	+
104	Nodular euthyroid goiter. Non-autoimmune hypergonadotropic hypogonadism	65	f									n/a
105	Type 2 diabetes	56	m									n/a
106	Healthy control	28	f									n/a
107	Type 2 diabetes. Non-autoimmune hypergonadotropic hypogonadism	56	f									n/a
108	Non-autoimmune hypogonadotropic hypogonadism	60	f									n/a
109	Graves disease	28	f					+				n/a
110	Primary hyperparathyroidism	40	f									n/a
111	Type 2 diabetes. Non-autoimmune hypergonadotropic hypogonadism	53	f									n/a
112	Type 2 diabetes. Non-autoimmune hypergonadotropic hypogonadism	62	f									n/a
113	Secondary adrenal insufficiency	34	m									n/a			+
114	APS-2. Primary adrenal insufficiency. Primary hypogonadism. Vitiligo	19	f		+	+						n/a						+	+				+		+
115	APS-1. Primary adrenal insufficiency. Hashimoto's thyroiditis, hypothyroidism. Type 1 diabetes. Chronic mucocutaneous candidiasis. Hypoparathyroidism. Alopecia totalis. Atrophic gastritis	30	f	+		+	+	+	+	+	+	+	+	+	+	+	+	+	+	+	+	+	+	+	+
116	Type 1 diabetes	19	f				+					n/a										+	+	+	+
117	Primary hyperparathyroidism.Non-autoimmune hypergonadotropic hypogonadism	72	f									n/a												+
118	Hypopituitarism. Secondary adrenal insufficiency. Secondary hypothyroidism. Secondary hypogonadism	19	m									n/a
119	APS-2. Primary adrenal insufficiency.Hypergonadotropic hypogonadism	35	f		+							n/a		+	+							+		+	+
120	Primary hyperparathyroidism	42	f									n/a
121	APS-2. Primary adrenal insufficiency. Hashimoto's thyroiditis, hypothyroidism. Hypergonadotropic hypogonadism	35	f		+	+		+				n/a		+	+									+	+
122	APS-2. Graves disease. Hypergonadotropic hypogonadism	44	f		+			+				n/a					+		+
123	Healthy control	60	f									n/a												+
124	APS-1. Primary adrenal insufficiency. Chronic mucocutaneous candidiasis. Megaloblastic anemia. Malabsorption syndrome. Enamel hypoplasia. Splenic hypoplasia	18	m	+		+			+	+	+	+	+	+	+
125	APS-1. Primary adrenal insufficiency. Hypoparathyroidism. Chronic mucocutaneous candidiasis. Hashimoto's thyroiditis, hypothyroidism. Hypergonadotropic hypogonadism. Vitiligo	45	f	+		+		+	+	+	+	+	+		+							+		+	+
126	Healthy control	31	m									n/a
127	Latent autoimmune diabetes in adults	55	f									n/a										+		+	+
128	Non-autoimmune hypergonadotropic hypogonadism	58	f									n/a
129	APS-1. Primary adrenal insufficiency. Primary hypoparathyroidism. Chronic mucocutaneous candidiasis. Alopecia areata	45	m	+		+			+	+	+	+	+	+		+	+			+				+	+
130	Healthy control	24	f									n/a
131	Hashimoto's thyroiditis, hypothyroidism	56	f					+				n/a										+	+	+	+
132	APS-2. Primary adrenal insufficiency. Hashimoto's thyroiditis, hypothyroidism. Hypergonadotropic hypogonadism	48	f		+	+		+				n/a			+							+	+	+	+
133	APS-1. Primary adrenal insufficiency. Hashimoto's thyroiditis, hypothyroidism. Chronic mucocutaneous candidiasis. Autoimmune fibrosing alveolitis. Alopecia totalis	27	m	+		+		+	+		+	+	+	+						+		+	+	+	+
134	Hypopituitarism. Secondary adrenal insufficiency . Secondary hypothyroidism	25	f									n/a
135	APS-1. Primary adrenal insufficiency. Hypoparathyroidism. Hypergonadotropic hypogonadism. Vitiligo. Malabsorption syndrome. Corneal dystrophy. Ptosis. Asplenia. Atrophic gastroduodenitis. Autoimmune hepatitis	30	f	+		+			+		+	+	+	+					+	+
136	APS-1. Primary adrenal insufficiency. Primary Hypoparathyroidism. Hypergonadotropic hypogonadism. Chronic mucocutaneous candidiasis. Corneal dystrophy. Atrophic gastritis	28	f	+		+			+	+	+	+	+	+
137	APS-2. Primary adrenal insufficiency. Hashimoto's thyroiditis, hypothyroidism. Hypergonadotropic hypogonadism.	37	f		+	+		+				n/a		+	+			+	+
138	Hypopituitarism. Secondary adrenal insufficiency . Secondary hypothyroidism. Hypogonadotropic hypogonadism. Central diabetes insipidus	34	f									n/a						+	+
139	APS-2. Hypergonadotropic hypogonadism. Hypoparathyroidism	33	f		+							n/a
140	Primary hyperparathyroidism.Non-autoimmune hypergonadotropic hypogonadism. Multinodular euthyroid goiter	65	f									n/a			+									+
141	Multinodular toxic goiter	58	m									n/a					+					+	+	+	+
142	Type 2 diabetes	55	m									n/a
143	Non-autoimmune hypergonadotronic hypogonadism	18	f									n/a
144	Secondary adrenal insufficiency	34	f									n/a
145	Hypopituitarism. Secondary adrenal insufficiency. Secondary hypothyroidism. Hypogonadotropic hypogonadism. Growth hormone deficiency	19	m									n/a
146	Hypopituitarism. Secondary adrenal insufficiency. Secondary hypothyroidism. Hypogonadotropic hypogonadism. Growth hormone deficiency. Central diabetes insipidus	54	m							n/a		n/a
147	Multiple Endocrine Neoplasia Type 1: multiple insulinomas, non-functioning pancreatic tumors, duodenal gastrinomas; primary hyperparathyroidism, lung carcinoids,hormonally inactivebilateral multifocal adrenal masses, hyperprolactinemia	45	f								+	+
148	APS-2. Primary adrenal insufficiency.Hypergonadotropic hypogonadism	36	f		+							n/a		+	+							+	+	+	+
149	Type 1 diabetes	29	f				+					n/a				+	+
150	Secondary adrenal insufficiency	25	f									n/a
151	Hypopituitarism. Secondary adrenal insufficiency. Secondary hypothyroidism. Hypogonadotropic hypogonadism	21	m									n/a												+
152	APS-1. Primary Hypoparathyroidism. Primary adrenal insufficiency. Chronic mucocutaneous candidiasis. Hypergonadotropic hypogonadism. Subtotal alopecia areata. Enamel hypoplasia	27	f	+					+	+	+	+	+		+						+			+
153	Healthy control	27	f									n/a								+	+
154	Non-autoimmune primary adrenal insufficiency	24	m									n/a		+	+					+	+
155	Type 2 diabetes. Multinodular euthyroid goiter. Non-autoimmune hypergonadotropic hypogonadism	68	f									n/a						+	+	+	+
156	APS-1. Primary adrenal insufficiency. Hypoparathyroidism. Chronic mucocutaneous candidiasis	36	m	+		+			+	+	+	+	+	+						+	+
157	Healthy control	29	f									n/a								+	+
158	Primary hyperparathyroidism. Multinodular euthyroid goiter. Non-autoimmune hypergonadotropic hypogonadism	54	f									n/a								+	+
159	Autoimmune hypergonadotropic hypogonadism	58	f									n/a													+
160	Healthy control	34	m									n/a								+	+
161	Primary hyperparathyroidism. Multinodular euthyroid goiter	30	f									n/a
162	Healthy control	30	f
163	Healthy control	29	f
164	Healthy control	24	m
165	Healthy control	23	f
166	Healthy control	28	f
167	Healthy control	25	f									n/a
168	APS-1. Hypoparathyroidism. Primary adrenal insufficiency. Diffuse alopecia areata. Vitiligo. Hypergonadotropic hypogonadism.	32	f	+		+			+	+	+	+	+		+	+	+			+	+	+		+	+
169	Hashimoto's thyroiditis, hypothyroidism	27	f					+				n/a										+	+	+	+
170	Type 2 diabetes. Multinodular euthyroid goiter.Non-autoimmune hypergonadotropic hypogonadism	65	f									n/a												+
171	Type 1 diabetes	25	f				+					n/a				+	+			+	+				+
172	Hashimoto's thyroiditis, hypothyroidism	36	f					+				n/a												+	+
173	Primary hyperparathyroidism. Nodular euthyroid goiter	51	f									n/a
174	Type 1 diabetes	28	f				+					n/a				+	+			+	+
175	Non-autoimmune hypergonadotropic hypogonadism	18	f									n/a											+		+
176	Papillary thyroid cancer	35	m									n/a
177	Type 2 diabetes. Non-autoimmune hypergonadotropic hypogonadism	45	m									n/a
178	Healthy control	40	m									n/a									+
179	Multinodular goiter. Subclinical destructive thyrotoxicosis. Non-autoimmune hypergonadotropic hypogonadism	53	f									n/a												+
180	Multinodular euthyroid goiter	39	m									n/a
181	Multinodular euthyroid goiter. Non-autoimmune hypergonadotropic hypogonadism	59	f									n/a
182	Multinodular euthyroid goiter. Non-autoimmune hypergonadotropic hypogonadism	64	f									n/a
183	Non-autoimmune hypergonadotropic hypogonadism	19	f									n/a
184	Multinodular euthyroid goiter. Primary hyperparathyroidism. Non-autoimmune hypergonadotropic hypogonadism	54	f									n/a													+
185	Follicular neoplasm of the thyroid gland. Hypersecretion of calcitonin	36	f									n/a												+	+
186	Primary hyperparathyroidism. Non-autoimmune hypergonadotropic hypogonadism	63	f									n/a
187	Primary hyperparathyroidism	51	m									n/a		+
188	Nodular euthyroid goiter	40	f									n/a
189	APS-1. Hypoparathyroidism. Primary adrenal insufficiency. Chronic mucocutaneous candidiasis. Hypergonadotropic hypogonadism. Atrophic gastroduodenitis. Malabsorption syndrome. Enamel hypoplasia. Retinitis pigmentosa	31	f	+		+			+	+	+	+	+	+		+	+			+	+
190	APS-2. Primary adrenal insufficiency. Hashimoto's thyroiditis, hypothyroidism. Type 1 diabetes	28	f		+	+	+	+		n/a		n/a		+	+	+	+			+	+	+		+	+
191	APS-1. Primary adrenal insufficiency. Primary hypoparathyroidism. Oral candidiasis. Hypergonadotropic hypogonadism. Psoriatic arthritis	44	f	+		+			+	+	+	+			+	+	+			+	+
192	Healthy control	44	f													+	+		+
193	Hashimoto's thyroiditis, hypothyroidism. Vitiligo.	29	f					+				n/a												+	+
194	APS-1. Primary adrenal insufficiency. Hypoparathyroidism. Hypergonadotropic hypogonadism. Hashimoto's thyroiditis, hypothyroidism. Mucocutaneous candidiasis. Atrophic gastritis. Alopecia areata	25	f	+		+		+	+	+	+	+	+		+					+		+	+	+	+
195	APS-2. Type 1 diabetes. Autoimmune hypergonadotropic hypogonadism	25	f		+		+					n/a
196	APS-2. Hashimoto's thyroiditis, hypothyroidism. Graves' ophthalmopathy. Hypergonadotropic hypogonadism. Central diabetes insipidus. Corneal epitheliopathy	30	f		+			+		n/a		n/a										+	+	+	+
197	Healthy control	26	f
198	Type 1 diabetes	19	f				+					n/a												+
199	Healthy control	26	f
200	Non-autoimmune primary adrenal insufficiency	38	m									n/a
201	Type 2 diabetes. Non-autoimmune hypergonadotropic hypogonadism	54	f									n/a
202	APS-2. Autoimmune hypergonadotropic hypogonadism. Primary adrenal insufficiency	44	f		+							n/a										+	+	+
203	APS-2. Primary adrenal insufficiency. Hashimoto's thyroiditis, hypothyroidism. Type 1 diabetes	26	m		+	+	+	+				n/a		+	+							+	+	+	+
204	APS-2. Primary adrenal insufficiency. Hashimoto's thyroiditis, hypothyroidism. Type 2 1 diabetes	26	f		+	+	+	+				n/a		+	+
205	Healthy control	47	f
206	Healthy control	47	m																					+
