# Supplementary material for: Diagnostic Accuracy of Methods for Detection of Antibodies against Type I Interferons in Patients with Endocrine Disorders
Source: Preprints.org preprint supplement (doi:10.20944/preprints202211.0168.v1), 2022-11-09
Supplement: Supplementary file 3 [file Table S3. Age and gender in groups of participants.docx]

**Table S3.** Age and gender in groups of participants

| Group | Patients | | | | |
| --- | --- | --- | --- | --- | --- |
| n | Age (years) | Gender (Femail/Male) | | |
| n | % | ratio |
| 1 | 18 | 18-49 | 13/5 | 72/28 | 2,6:1 |
| 2 | 89 | 19-72 | 75/14 | 84/16 | 5,4:1 |
| 3 | 71 | 18-88 | 51/20 | 72/28 | 2,6:1 |
| 4 | 28 | 18-60 | 22/6 | 79/21 | 3,6:1 |
